# Supplementary material for: Impact of mineral and bone disorder on healthcare resource use and associated costs in the European Fresenius medical care dialysis population: a retrospective cohort study
Source: PubMed Central journal article supplement (PMC3504570; doi:10.1186/1471-2369-13-140), 2012-10-29
Supplement: 1471-2369-13-140-S5.pdf [file 1471-2369-13-140-S5.pdf]

**Supplementary Table S5. Subcategories of healthcare costs per month by baseline total calcium, Hungary, Italy, Portugal, Spain, and Turkey.**

|                                                                                                           | Baseline total calcium*, mmol/mL |                 |               |               | Total         |
|-----------------------------------------------------------------------------------------------------------|----------------------------------|-----------------|---------------|---------------|---------------|
|                                                                                                           | < 2.10                           | ≥ 2.10 – ≤ 2.37 | > 2.37        | Missing       |               |
| N patients                                                                                                | 833                              | 2980            | 1405          | 168           | 5386          |
| Cost of CVD-related hospitalisations per month (including patients with zero costs), 2006 €               |                                  |                 |               |               |               |
| Mean                                                                                                      | 22.56                            | 16.30           | 14.03         | 27.37         | 17.02         |
| SD                                                                                                        | 300.96                           | 215.75          | 135.50        | 135.43        | 212.40        |
| Median                                                                                                    | 0.00                             | 0.00            | 0.00          | 0.00          | 0.00          |
| Q1, Q3                                                                                                    | 0.00, 0.00                       | 0.00, 0.00      | 0.00, 0.00    | 0.00, 0.00    | 0.00, 0.00    |
| Min, Max                                                                                                  | 0.00, 7501.80                    | 0.00, 9533.54   | 0.00, 3790.69 | 0.00, 1142.98 | 0.00, 9533.54 |
| Patients with CVD-related hospitalisation cost per month > €0, n (%)                                      | 23 (3)                           | 98 (3)          | 49 (3)        | 10 (6)        | 180 (3)       |
| Cost of fracture-related hospitalisations per month (including patients with zero costs), 2006 €          |                                  |                 |               |               |               |
| Mean                                                                                                      | 3.58                             | 3.08            | 2.98          | 5.34          | 3.20          |
| SD                                                                                                        | 38.86                            | 39.26           | 53.38         | 52.41         | 43.75         |
| Median                                                                                                    | 0.00                             | 0.00            | 0.00          | 0.00          | 0.00          |
| Q1, Q3                                                                                                    | 0.00, 0.00                       | 0.00, 0.00      | 0.00, 0.00    | 0.00, 0.00    | 0.00, 0.00    |
| Min, Max                                                                                                  | 0.00, 687.51                     | 0.00, 941.99    | 0.00, 1762.45 | 0.00, 623.02  | 0.00, 1762.45 |
| Patients with fracture-related hospitalisation cost per month > €0, n (%)                                 | 9 (1)                            | 26 (1)          | 11 (1)        | 2 (1)         | 48 (1)        |
| Cost of parathyroidectomy-related hospitalisations per month (including patients with zero costs), 2006 € |                                  |                 |               |               |               |
| Mean                                                                                                      | 0.19                             | 1.69            | 2.91          | 0.00          | 1.73          |
| SD                                                                                                        | 5.56                             | 31.23           | 41.16         | 0.00          | 31.42         |
| Median                                                                                                    | 0.00                             | 0.00            | 0.00          | 0.00          | 0.00          |
| Q1, Q3                                                                                                    | 0.00, 0.00                       | 0.00, 0.00      | 0.00, 0.00    | 0.00, 0.00    | 0.00, 0.00    |
| Min, Max                                                                                                  | 0.00, 160.47                     | 0.00, 1133.29   | 0.00, 1133.29 | 0.00, 0.00    | 0.00, 1133.29 |
| Patients with parathyroidectomy-related hospitalisation cost per month > €0, n (%)                        | 1 (0)                            | 15 (1)          | 14 (1)        | 0 (0)         | 30 (1)        |
| Cost of CVD medications per month (including patients with zero costs), 2006 €                            |                                  |                 |               |               |               |
| Mean                                                                                                      | 13.73                            | 15.05           | 15.09         | 15.16         | 14.86         |
| SD                                                                                                        | 22.29                            | 23.56           | 23.27         | 20.66         | 23.21         |
| Median                                                                                                    | 3.78                             | 4.96            | 5.19          | 8.28          | 5.00          |
| Q1, Q3                                                                                                    | 0.00, 15.37                      | 0.00, 20.22     | 0.00, 19.54   | 0.00, 21.52   | 0.00, 19.41   |
| Min, Max                                                                                                  | 0.00, 168.59                     | 0.00, 331.96    | 0.00, 217.84  | 0.00, 111.22  | 0.00, 331.96  |
| Patients with CVD medication cost per month > €0, n (%)                                                   | 581 (70)                         | 2212 (74)       | 1035 (74)     | 121 (72)      | 3949 (73)     |

|                                                                                            | Baseline total calcium*, mmol/mL |                 |              |              | Total        |
|--------------------------------------------------------------------------------------------|----------------------------------|-----------------|--------------|--------------|--------------|
|                                                                                            | < 2.10                           | ≥ 2.10 – ≤ 2.37 | > 2.37       | Missing      |              |
| <b>Cost of SHPT medications per month (including patients with zero costs), 2006 €</b>     |                                  |                 |              |              |              |
| Mean                                                                                       | 26.44                            | 33.17           | 49.61        | 27.01        | 36.22        |
| SD                                                                                         | 45.35                            | 58.47           | 74.61        | 33.62        | 61.36        |
| Median                                                                                     | 7.77                             | 8.45            | 16.41        | 9.96         | 9.39         |
| Q1, Q3                                                                                     | 2.08, 35.08                      | 2.05, 39.98     | 2.76, 72.46  | 2.10, 40.01  | 2.26, 44.95  |
| Min, Max                                                                                   | 0.00, 461.33                     | 0.00, 662.47    | 0.00, 567.16 | 0.00, 113.88 | 0.00, 662.47 |
| Patients with SHPT medication cost per month > €0, n (%)                                   | 681 (82)                         | 2474 (83)       | 1200 (85)    | 148 (88)     | 4503 (84)    |
| <b>Cost of diabetes medications per month (including patients with zero costs), 2006 €</b> |                                  |                 |              |              |              |
| Mean                                                                                       | 4.02                             | 3.28            | 1.48         | 1.08         | 2.86         |
| SD                                                                                         | 26.03                            | 22.47           | 11.27        | 5.66         | 20.47        |
| Median                                                                                     | 0.00                             | 0.00            | 0.00         | 0.00         | 0.00         |
| Q1, Q3                                                                                     | 0.00, 0.00                       | 0.00, 0.00      | 0.00, 0.00   | 0.00, 0.00   | 0.00, 0.00   |
| Min, Max                                                                                   | 0.00, 450.89                     | 0.00, 554.20    | 0.00, 237.15 | 0.00, 67.10  | 0.00, 554.20 |
| Patients with diabetes medication cost per month > €0, n (%)                               | 124 (15)                         | 415 (14)        | 144 (10)     | 22 (13)      | 705 (13)     |

CVD, cardiovascular disease; SHPT, secondary hyperparathyroidism

\*Mean total calcium during 3-month baseline period
