# Supplementary material for: Impact of mineral and bone disorder on healthcare resource use and associated costs in the European Fresenius medical care dialysis population: a retrospective cohort study
Source: PubMed Central journal article supplement (PMC3504570; doi:10.1186/1471-2369-13-140), 2012-10-29
Supplement: 1471-2369-13-140-S6.pdf [file 1471-2369-13-140-S6.pdf]

**Supplementary Table S6. Subcategories of healthcare costs per month by baseline phosphate, Hungary, Italy, Portugal, Spain, and Turkey.**

|                                                                                                           | Baseline phosphate*, mmol/mL |                 |               | Missing       | Total         |
|-----------------------------------------------------------------------------------------------------------|------------------------------|-----------------|---------------|---------------|---------------|
|                                                                                                           | < 1.13                       | ≥ 1.13 – ≤ 1.78 | > 1.78        |               |               |
| N patients                                                                                                | 827                          | 3104            | 1208          | 247           | 5386          |
| Cost of CVD-related hospitalisations per month (including patients with zero costs), 2006 €               |                              |                 |               |               |               |
| Mean                                                                                                      | 16.47                        | 18.30           | 13.22         | 21.41         | 17.02         |
| SD                                                                                                        | 150.00                       | 259.92          | 97.81         | 113.06        | 212.40        |
| Median                                                                                                    | 0.00                         | 0.00            | 0.00          | 0.00          | 0.00          |
| Q1, Q3                                                                                                    | 0.00, 0.00                   | 0.00, 0.00      | 0.00, 0.00    | 0.00, 0.00    | 0.00, 0.00    |
| Min, Max                                                                                                  | 0.00, 3790.69                | 0.00, 9533.54   | 0.00, 1879.98 | 0.00, 1142.98 | 0.00, 9533.54 |
| Patients with CVD-related hospitalisation cost per month > €0, n (%)                                      | 33 (4)                       | 91 (3)          | 43 (4)        | 13 (5)        | 180 (3)       |
| Cost of fracture-related hospitalisations per month (including patients with zero costs), 2006 €          |                              |                 |               |               |               |
| Mean                                                                                                      | 6.06                         | 3.02            | 1.63          | 3.63          | 3.20          |
| SD                                                                                                        | 56.61                        | 44.35           | 30.00         | 43.25         | 43.75         |
| Median                                                                                                    | 0.00                         | 0.00            | 0.00          | 0.00          | 0.00          |
| Q1, Q3                                                                                                    | 0.00, 0.00                   | 0.00, 0.00      | 0.00, 0.00    | 0.00, 0.00    | 0.00, 0.00    |
| Min, Max                                                                                                  | 0.00, 857.85                 | 0.00, 1762.45   | 0.00, 941.99  | 0.00, 623.02  | 0.00, 1762.45 |
| Patients with fracture-related hospitalisation cost per month > €0, n (%)                                 | 13 (2)                       | 26 (1)          | 7 (1)         | 2 (1)         | 48 (1)        |
| Cost of parathyroidectomy-related hospitalisations per month (including patients with zero costs), 2006 € |                              |                 |               |               |               |
| Mean                                                                                                      | 2.28                         | 1.21            | 3.01          | 0.00          | 1.73          |
| SD                                                                                                        | 42.76                        | 25.18           | 38.98         | 0.00          | 31.42         |
| Median                                                                                                    | 0.00                         | 0.00            | 0.00          | 0.00          | 0.00          |
| Q1, Q3                                                                                                    | 0.00, 0.00                   | 0.00, 0.00      | 0.00, 0.00    | 0.00, 0.00    | 0.00, 0.00    |
| Min, Max                                                                                                  | 0.00, 1133.29                | 0.00, 933.83    | 0.00, 1133.29 | 0.00, 0.00    | 0.00, 1133.29 |
| Patients with parathyroidectomy-related hospitalisation cost per month > €0, n (%)                        | 4 (0)                        | 13 (0)          | 13 (1)        | 0 (0)         | 30 (1)        |
| Cost of CVD medications per month (including patients with zero costs), 2006 €                            |                              |                 |               |               |               |
| Mean                                                                                                      | 14.64                        | 14.96           | 14.53         | 15.84         | 14.86         |
| SD                                                                                                        | 23.96                        | 23.20           | 23.42         | 19.42         | 23.21         |
| Median                                                                                                    | 3.53                         | 4.76            | 5.82          | 9.04          | 5.00          |
| Q1, Q3                                                                                                    | 0.00, 18.61                  | 0.00, 20.10     | 0.05, 17.88   | 0.94, 22.23   | 0.00, 19.41   |
| Min, Max                                                                                                  | 0.00, 217.84                 | 0.00, 211.68    | 0.00, 331.96  | 0.00, 104.44  | 0.00, 331.96  |
| Patients with CVD medication cost per month > €0, n (%)                                                   | 574 (69)                     | 2274 (73)       | 908 (75)      | 193 (78)      | 3949 (73)     |

|                                                                                            | Baseline phosphate*, mmol/mL |                 |              | Missing      | Total        |
|--------------------------------------------------------------------------------------------|------------------------------|-----------------|--------------|--------------|--------------|
|                                                                                            | < 1.13                       | ≥ 1.13 – ≤ 1.78 | > 1.78       |              |              |
| <b>Cost of SHPT medications per month (including patients with zero costs), 2006 €</b>     |                              |                 |              |              |              |
| Mean                                                                                       | 18.70                        | 34.62           | 54.66        | 24.89        | 36.22        |
| SD                                                                                         | 40.31                        | 57.64           | 78.93        | 40.22        | 61.36        |
| Median                                                                                     | 4.27                         | 9.59            | 27.03        | 5.71         | 9.39         |
| Q1, Q3                                                                                     | 0.00, 11.78                  | 2.26, 41.68     | 4.60, 74.10  | 1.51, 36.08  | 2.26, 44.95  |
| Min, Max                                                                                   | 0.00, 326.86                 | 0.00, 502.02    | 0.00, 662.47 | 0.00, 365.41 | 0.00, 662.47 |
| Patients with SHPT medication cost per month > €0, n (%)                                   | 615 (74)                     | 2618 (84)       | 1059 (88)    | 211 (85)     | 4503 (84)    |
| <b>Cost of diabetes medications per month (including patients with zero costs), 2006 €</b> |                              |                 |              |              |              |
| Mean                                                                                       | 3.87                         | 3.16            | 1.82         | 0.82         | 2.86         |
| SD                                                                                         | 25.49                        | 21.03           | 16.73        | 4.80         | 20.47        |
| Median                                                                                     | 0.00                         | 0.00            | 0.00         | 0.00         | 0.00         |
| Q1, Q3                                                                                     | 0.00, 0.00                   | 0.00, 0.00      | 0.00, 0.00   | 0.00, 0.00   | 0.00, 0.00   |
| Min, Max                                                                                   | 0.00, 366.86                 | 0.00, 554.20    | 0.00, 450.89 | 0.00, 67.10  | 0.00, 554.20 |
| Patients with diabetes medication cost per month > €0, n (%)                               | 131 (16)                     | 428 (14)        | 121 (10)     | 25 (10)      | 705 (13)     |

CVD, cardiovascular disease; SHPT, secondary hyperparathyroidism

\*Mean phosphate during 3-month baseline period
