# Supplementary material for: Impact of mineral and bone disorder on healthcare resource use and associated costs in the European Fresenius medical care dialysis population: a retrospective cohort study
Source: BMC Nephrol. 2012 Oct 29;13:140. doi: 10.1186/1471-2369-13-140 (PMC3504570; doi:10.1186/1471-2369-13-140)
Supplement: Additional file 1 — Supplementary Table S1. ICD-10 codes used to identify hospitalisations related to cardiovascular disease, fractures, and parathyroidectomy. Description: List of ICD-10 codes used to identify SHPT-related hospitalisations in the EuCliD database. [file 1471-2369-13-140-S1.pdf]

**Supplementary Table S1. ICD-10 codes used to identify hospitalisations related to cardiovascular disease, fractures, and parathyroidectomy.**

| <b>Cardiovascular disease :</b>                         |                                                                                             |
|---------------------------------------------------------|---------------------------------------------------------------------------------------------|
| <b>Diseases of the circulatory system<br/>(I00-I99)</b> |                                                                                             |
| <b>I74</b>                                              | <b>Arterial embolism and thrombosis</b>                                                     |
| I74.0                                                   | Embolism and thrombosis of abdominal aorta                                                  |
| I74.1                                                   | Embolism and thrombosis of other and unspecified parts of aorta                             |
| I74.2                                                   | Embolism and thrombosis of arteries of upper extremities                                    |
| I74.3                                                   | Embolism and thrombosis of arteries of lower extremities                                    |
| I74.4                                                   | Embolism and thrombosis of arteries of extremities, unspecified                             |
| I74.5                                                   | Embolism and thrombosis of iliac artery                                                     |
| I74.8                                                   | Embolism and thrombosis of other arteries                                                   |
| I74.9                                                   | Embolism and thrombosis of unspecified artery                                               |
| <b>Hypertensive diseases<br/>(I10-I15)</b>              |                                                                                             |
| <b>I10</b>                                              | <b>Essential (primary) hypertension</b>                                                     |
| <b>I11</b>                                              | <b>Hypertensive heart disease</b>                                                           |
| I11.0                                                   | Hypertensive heart disease with (congestive) heart failure                                  |
| I11.9                                                   | Hypertensive heart disease without (congestive) heart failure                               |
| <b>I12</b>                                              | <b>Hypertensive renal disease</b>                                                           |
| I12.0                                                   | Hypertensive renal disease with renal failure                                               |
| I12.9                                                   | Hypertensive renal disease without renal failure                                            |
| <b>I13</b>                                              | <b>Hypertensive heart and renal disease</b>                                                 |
| I13.0                                                   | Hypertensive heart and renal disease with (congestive) heart failure                        |
| I13.1                                                   | Hypertensive heart and renal disease with renal failure                                     |
| I13.2                                                   | Hypertensive heart and renal disease with both (congestive) heart failure and renal failure |
| I13.9                                                   | Hypertensive heart and renal disease, unspecified                                           |
| <b>I15</b>                                              | <b>Secondary hypertension</b>                                                               |
| I15.0                                                   | Renovascular hypertension                                                                   |
| I15.1                                                   | Hypertension secondary to other renal disorders                                             |
| I15.2                                                   | Hypertension secondary to endocrine disorders                                               |
| I15.8                                                   | Other secondary hypertension                                                                |
| I15.9                                                   | Secondary hypertension, unspecified                                                         |
| <b>Ischaemic heart diseases<br/>(I20-I25)</b>           |                                                                                             |
| <b>I20</b>                                              | <b>Angina pectoris</b>                                                                      |
| I20.0                                                   | Unstable angina                                                                             |
| I20.1                                                   | Angina pectoris with documented spasm                                                       |
| I20.8                                                   | Other forms of angina pectoris                                                              |
| I20.9                                                   | Angina pectoris, unspecified                                                                |
| <b>I21</b>                                              | <b>Acute myocardial infarction</b>                                                          |
| I21.0                                                   | Acute transmural myocardial infarction of anterior wall                                     |
| I21.1                                                   | Acute transmural myocardial infarction of inferior wall                                     |
| I21.2                                                   | Acute transmural myocardial infarction of other sites                                       |
| I21.3                                                   | Acute transmural myocardial infarction of unspecified site                                  |
| I21.4                                                   | Acute subendocardial myocardial infarction                                                  |
| I21.9                                                   | Acute myocardial infarction, unspecified                                                    |
| <b>I22</b>                                              | <b>Subsequent myocardial infarction</b>                                                     |
| I22.0                                                   | Subsequent myocardial infarction of anterior wall                                           |
| I22.1                                                   | Subsequent myocardial infarction of inferior wall                                           |
| I22.8                                                   | Subsequent myocardial infarction of other sites                                             |
| I22.9                                                   | Subsequent myocardial infarction of unspecified site                                        |

|                                 |                                                                                                                         |
|---------------------------------|-------------------------------------------------------------------------------------------------------------------------|
| <b>I23</b>                      | <b>Certain current complications following acute myocardial infarction</b>                                              |
| I23.0                           | Haemopericardium as current complication following acute myocardial infarction                                          |
| I23.1                           | Atrial septal defect as current complication following acute myocardial infarction                                      |
| I23.2                           | Ventricular septal defect as current complication following acute myocardial infarction                                 |
| I23.3                           | Rupture of cardiac wall without haemopericardium as current complication following acute myocardial infarction          |
| I23.4                           | Rupture of chordae tendineae as current complication following acute myocardial infarction                              |
| I23.5                           | Rupture of papillary muscle as current complication following acute myocardial infarction                               |
| I23.6                           | Thrombosis of atrium, auricular appendage, and ventricle as current complications following acute myocardial infarction |
| I23.8                           | Other current complications following acute myocardial infarction                                                       |
| <b>I24</b>                      | <b>Other acute ischaemic heart diseases</b>                                                                             |
| I24.0                           | Coronary thrombosis not resulting in myocardial infarction                                                              |
| I24.1                           | Dressler's syndrome                                                                                                     |
| I24.8                           | Other forms of acute ischaemic heart disease                                                                            |
| I24.9                           | Acute ischaemic heart disease, unspecified                                                                              |
| <b>I25</b>                      | <b>Chronic ischaemic heart disease</b>                                                                                  |
| I25.0                           | Atherosclerotic cardiovascular disease, so described                                                                    |
| I25.1                           | Atherosclerotic heart disease                                                                                           |
| I25.2                           | Old myocardial infarction                                                                                               |
| I25.3                           | Aneurysm of heart                                                                                                       |
| I25.4                           | Coronary artery aneurysm                                                                                                |
| I25.5                           | Ischaemic cardiomyopathy                                                                                                |
| I25.6                           | Silent myocardial ischaemia                                                                                             |
| I25.8                           | Other forms of chronic ischaemic heart disease                                                                          |
| I25.9                           | Chronic ischaemic heart disease, unspecified                                                                            |
| <b>Cerebrovascular diseases</b> |                                                                                                                         |
| <b>(I60-I69)</b>                |                                                                                                                         |
| <b>I60</b>                      | <b>Subarachnoid haemorrhage</b>                                                                                         |
| I60.0                           | Subarachnoid haemorrhage from carotid siphon and bifurcation                                                            |
| I60.1                           | Subarachnoid haemorrhage from middle cerebral artery                                                                    |
| I60.2                           | Subarachnoid haemorrhage from anterior communicating artery                                                             |
| I60.3                           | Subarachnoid haemorrhage from posterior communicating artery                                                            |
| I60.4                           | Subarachnoid haemorrhage from basilar artery                                                                            |
| I60.5                           | Subarachnoid haemorrhage from vertebral artery                                                                          |
| I60.6                           | Subarachnoid haemorrhage from other intracranial arteries                                                               |
| I60.7                           | Subarachnoid haemorrhage from intracranial artery, unspecified                                                          |
| I60.8                           | Other subarachnoid haemorrhage                                                                                          |
| I60.9                           | Subarachnoid haemorrhage, unspecified                                                                                   |
| <b>I61</b>                      | <b>Intracerebral haemorrhage</b>                                                                                        |
| I61.0                           | Intracerebral haemorrhage in hemisphere, subcortical                                                                    |
| I61.1                           | Intracerebral haemorrhage in hemisphere, cortical                                                                       |
| I61.2                           | Intracerebral haemorrhage in hemisphere, unspecified                                                                    |
| I61.3                           | Intracerebral haemorrhage in brain stem                                                                                 |
| I61.4                           | Intracerebral haemorrhage in cerebellum                                                                                 |
| I61.5                           | Intracerebral haemorrhage, intraventricular                                                                             |
| I61.6                           | Intracerebral haemorrhage, multiple localized                                                                           |
| I61.8                           | Other intracerebral haemorrhage                                                                                         |
| I61.9                           | Intracerebral haemorrhage, unspecified                                                                                  |
| <b>I62</b>                      | <b>Other nontraumatic intracranial haemorrhage</b>                                                                      |
| I62.0                           | Subdural haemorrhage (acute)(nontraumatic)                                                                              |
| I62.1                           | Nontraumatic extradural haemorrhage                                                                                     |
| I62.9                           | Intracranial haemorrhage (nontraumatic), unspecified                                                                    |
| <b>I63</b>                      | <b>Cerebral infarction</b>                                                                                              |
| I63.0                           | Cerebral infarction due to thrombosis of precerebral arteries                                                           |
| I63.1                           | Cerebral infarction due to embolism of precerebral arteries                                                             |

|                                       |                                                                                             |
|---------------------------------------|---------------------------------------------------------------------------------------------|
| I63.2                                 | Cerebral infarction due to unspecified occlusion or stenosis of precerebral arteries        |
| I63.3                                 | Cerebral infarction due to thrombosis of cerebral arteries                                  |
| I63.4                                 | Cerebral infarction due to embolism of cerebral arteries                                    |
| I63.5                                 | Cerebral infarction due to unspecified occlusion or stenosis of cerebral arteries           |
| I63.6                                 | Cerebral infarction due to cerebral venous thrombosis, nonpyogenic                          |
| I63.8                                 | Other cerebral infarction                                                                   |
| I63.9                                 | Cerebral infarction, unspecified                                                            |
| <b>I64</b>                            | <b>Stroke, not specified as haemorrhage or infarction</b>                                   |
| <b>I65</b>                            | <b>Occlusion and stenosis of precerebral arteries, not resulting in cerebral infarction</b> |
| I65.0                                 | Occlusion and stenosis of vertebral artery                                                  |
| I65.1                                 | Occlusion and stenosis of basilar artery                                                    |
| I65.2                                 | Occlusion and stenosis of carotid artery                                                    |
| I65.3                                 | Occlusion and stenosis of multiple and bilateral precerebral arteries                       |
| I65.8                                 | Occlusion and stenosis of other precerebral artery                                          |
| I65.9                                 | Occlusion and stenosis of unspecified precerebral artery                                    |
| <b>I66</b>                            | <b>Occlusion and stenosis of cerebral arteries, not resulting in cerebral infarction</b>    |
| I66.0                                 | Occlusion and stenosis of middle cerebral artery                                            |
| I66.1                                 | Occlusion and stenosis of anterior cerebral artery                                          |
| I66.2                                 | Occlusion and stenosis of posterior cerebral artery                                         |
| I66.3                                 | Occlusion and stenosis of cerebellar arteries                                               |
| I66.4                                 | Occlusion and stenosis of multiple and bilateral cerebral arteries                          |
| I66.8                                 | Occlusion and stenosis of other cerebral artery                                             |
| I66.9                                 | Occlusion and stenosis of unspecified cerebral artery                                       |
| <b>I67</b>                            | <b>Other cerebrovascular diseases</b>                                                       |
| I67.0                                 | Dissection of cerebral arteries, nonruptured                                                |
| I67.1                                 | Cerebral aneurysm, nonruptured                                                              |
| I67.2                                 | Cerebral atherosclerosis                                                                    |
| I67.3                                 | Progressive vascular leukoencephalopathy                                                    |
| I67.4                                 | Hypertensive encephalopathy                                                                 |
| I67.5                                 | Moyamoya disease                                                                            |
| I67.6                                 | Nonpyogenic thrombosis of intracranial venous system                                        |
| I67.7                                 | Cerebral arteritis, not elsewhere classified                                                |
| I67.8                                 | Other specified cerebrovascular diseases                                                    |
| I67.9                                 | Cerebrovascular disease, unspecified                                                        |
| <b>I68</b>                            | <b>Cerebrovascular disorders in diseases classified elsewhere</b>                           |
| I68.0                                 | Cerebral amyloid angiopathy ( E85.-+ )                                                      |
| I68.1                                 | Cerebral arteritis in infectious and parasitic diseases classified elsewhere                |
| I68.2                                 | Cerebral arteritis in other diseases classified elsewhere                                   |
| I68.8                                 | Other cerebrovascular disorders in diseases classified elsewhere                            |
| <b>I69</b>                            | <b>Sequelae of cerebrovascular disease</b>                                                  |
| I69.0                                 | Sequelae of subarachnoid haemorrhage                                                        |
| I69.1                                 | Sequelae of intracerebral haemorrhage                                                       |
| I69.2                                 | Sequelae of other nontraumatic intracranial haemorrhage                                     |
| I69.3                                 | Sequelae of cerebral infarction                                                             |
| I69.4                                 | Sequelae of stroke, not specified as haemorrhage or infarction                              |
| I69.8                                 | Sequelae of other and unspecified cerebrovascular diseases                                  |
| <b>Diseases of the nervous system</b> |                                                                                             |
| <b>(G00-G99)</b>                      |                                                                                             |
| <b>G45</b>                            | <b>Transient cerebral ischaemic attacks and related syndromes</b>                           |
| G45.0                                 | Vertebro-basilar artery syndrome                                                            |
| G45.1                                 | Carotid artery syndrome (hemispheric)                                                       |
| G45.2                                 | Multiple and bilateral precerebral artery syndromes                                         |
| G45.3                                 | Amaurosis fugax                                                                             |
| G45.4                                 | Transient global amnesia                                                                    |
| G45.8                                 | Other transient cerebral ischaemic attacks and related syndromes                            |
| G45.9                                 | Transient cerebral ischaemic attack, unspecified                                            |

| <b>Fractures:</b> |                                                                    |
|-------------------|--------------------------------------------------------------------|
| <b>S12</b>        | <b>Fracture of neck</b>                                            |
| S12.0             | Fracture of first cervical vertebra                                |
| S12.1             | Fracture of second cervical vertebra                               |
| S12.2             | Fracture of other specified cervical vertebra                      |
| S12.7             | Multiple fractures of cervical spine                               |
| S12.9             | Fracture of neck, part unspecified                                 |
| <b>S22</b>        | <b>Fracture of rib(s), sternum and thoracic spine</b>              |
| S22.0             | Fracture of thoracic vertebra                                      |
| S22.1             | Multiple fractures of thoracic spine                               |
| S22.2             | Fracture of sternum                                                |
| S22.3             | Fracture of rib(s), sternum and thoracic spine                     |
| S22.4             | Multiple fractures of ribs                                         |
| S22.5             | Flail chest                                                        |
| S22.8             | Fracture of other parts of bony thorax                             |
| S22.9             | Fracture of bony thorax, part unspecified                          |
| <b>S32</b>        | <b>Fracture of lumbar spine and pelvis</b>                         |
| S32.0             | Fracture of lumbar vertebra                                        |
| S32.1             | Fracture of sacrum                                                 |
| S32.2             | Fracture of coccyx                                                 |
| S32.3             | Fracture of ilium                                                  |
| S32.4             | Fracture of acetabulum                                             |
| S32.5             | Fracture of pubis                                                  |
| S32.7             | Multiple fractures of lumbar spine and pelvis                      |
| S32.8             | Fracture of other and unspecified parts of lumbar spine and pelvis |
| <b>S42</b>        | <b>Fracture of shoulder and upper arm</b>                          |
| S42.0             | Fracture of clavicle                                               |
| S42.1             | Fracture of scapula                                                |
| S42.2             | Fracture of upper end of humerus                                   |
| S42.3             | Fracture of shaft of humerus                                       |
| S42.4             | Fracture of lower end of humerus                                   |
| S42.7             | Multiple fractures of clavicle, scapula and humerus                |
| S42.8             | Fracture of other parts of shoulder and upper arm                  |
| S42.9             | Fracture of shoulder girdle, part unspecified                      |
| <b>S52</b>        | <b>Fracture of forearm</b>                                         |
| S52.0             | Fracture of upper end of ulna                                      |
| S52.1             | Fracture of upper end of radius                                    |
| S52.3             | Fracture of shaft of ulna                                          |
| S52.4             | Fracture of shaft of radius                                        |
| S52.5             | Fracture of shaft of both ulna and radius                          |
| S52.6             | Fracture of lower end of both ulna and radius                      |
| S52.7             | Multiple fractures of forearm                                      |
| S52.8             | Fracture of other parts of forearm                                 |
| S52.9             | Fracture of forearm, part unspecified                              |
| <b>S62</b>        | <b>Fracture at wrist and hand level</b>                            |
| S62.0             | Fracture of navicular [scaphoid] bone of hand                      |
| S62.1             | Fracture of other carpal bone(s)                                   |
| S62.3             | Fracture of other metacarpal bone                                  |
| S62.4             | Multiple fractures of metacarpal bones                             |
| S62.5             | Fracture of thumb                                                  |
| S62.6             | Fracture of other finger                                           |
| S62.7             | Multiple fracture of fingers                                       |
| S62.8             | Fracture of other and unspecified parts of wrist and hand          |
| <b>S72</b>        | <b>Fracture of femur</b>                                           |
| S72.0             | Fracture of neck of femur                                          |
| S72.1             | Pertrochanteric fracture                                           |

---

|            |                                                                          |
|------------|--------------------------------------------------------------------------|
| S72.2      | Subtrochanteric fracture                                                 |
| S72.3      | Fracture of the shaft of femur                                           |
| S72.4      | Fracture of lower end of femur                                           |
| S72.7      | Multiple fractures of femur                                              |
| S72.8      | Fractures of other parts of femur                                        |
| S72.9      | Fracture of femur, part unspecified                                      |
| <b>S82</b> | <b>Fracture of lower leg, including ankle</b>                            |
| S82.1      | Fracture of upper end of tibia                                           |
| S82.2      | Fracture of shaft of tibia                                               |
| S82.3      | Fracture of lower end of tibia                                           |
| S82.4      | Fracture of fibula alone                                                 |
| S82.5      | Fracture of medial malleolus                                             |
| S82.6      | Fracture of lateral malleolus                                            |
| S82.7      | Multiple fractures of lower leg                                          |
| S82.8      | Fractures of other parts of lower leg                                    |
| S82.9      | Fracture of lower leg, part unspecified                                  |
| <b>S92</b> | <b>Fracture of foot, except ankle</b>                                    |
| S92.0      | Fracture of calcaneus                                                    |
| S92.1      | Fracture of talus                                                        |
| S92.2      | Fracture of other tarsal bone(s)                                         |
| S92.3      | Fracture of metatarsal bone                                              |
| S92.4      | Fracture of great toe                                                    |
| S92.5      | Fracture of other toe                                                    |
| S92.7      | Multiple fractures of foot                                               |
| S92.9      | Fracture of foot, unspecified                                            |
| <b>T02</b> | <b>Fractures involving multiple body regions</b>                         |
| T02.1      | Fractures involving thorax with lower back and pelvis                    |
| T02.2      | Fractures involving multiple regions of one upper limb                   |
| T02.3      | Fractures involving multiple regions of one lower limb                   |
| T02.4      | Fractures involving multiple regions of both upper limbs                 |
| T02.5      | Fractures involving multiple regions of both lower limbs                 |
| T02.6      | Fractures involving multiple regions of upper limb(s) with lower limb(s) |
| T02.7      | Fractures involving thorax with lower back and pelvis with limb(s)       |
| T02.8      | Fractures involving other combinations of body regions                   |
| T02.9      | Multiple fractures, unspecified                                          |
| <b>T08</b> | <b>Fracture of spine, level unspecified</b>                              |
| <b>T10</b> | <b>Fracture of upper limb, level unspecified</b>                         |
| <b>T12</b> | <b>Fracture of lower limb, level unspecified</b>                         |
| <b>T14</b> | <b>Injury of unspecified body region</b>                                 |
| T14.2      | Fracture of unspecified body region                                      |
| <b>T91</b> | <b>Sequelae of injuries of neck and trunk</b>                            |
| T91.1      | Sequelae of fracture of spine                                            |
| T91.2      | Sequelae of other fracture of thorax and pelvis                          |
| <b>T92</b> | <b>Sequelae of injuries of upper limb</b>                                |
| T92.1      | Sequelea of fracture of arm                                              |
| T92.2      | Sequelea of fracture at wrist and hand level                             |
| <b>T93</b> | <b>Sequelae of injuries of lower limb</b>                                |
| T93.1      | Sequelae of fracture of femur                                            |
| T93.2      | Sequelae of other fractures of lower limb                                |
| <b>M80</b> | <b>Osteoporosis with pathological fracture</b>                           |
| M80.5      | Idiopathic osteoporosis with pathological fracture                       |
| M80.8      | Other osteoporosis with pathological fracture                            |
| M80.9      | Unspecified osteoporosis with pathological fracture                      |
| <b>M84</b> | <b>Disorders of continuity of bone</b>                                   |
| M84.4      | Pathological fracture, not elsewhere classified                          |

---

---

**Parathyroidectomy:**

**E21 Hyperparathyroidism and other disorders of parathyroid gland**

E21.1 Secondary hyperparathyroidism, not elsewhere classified

E21.2 Other hyperparathyroidism

E21.3 Hyperparathyroidism, unspecified

---

Source: **International Statistical Classification of Diseases and Related Health Problems 10th Revision** [<http://apps.who.int/classifications/icd10/browse/2010/en>]
